# Supplementary material
Source: publisher site journal article supplement (https://www.dovepress.com/article/302784)
Supplement: Supplementary file 1 [file get_supplementary_file.php]

**Supplementary file; Questionnaire**

Adapted from Härter M, Scholl I. The 9-item Shared Decision Making Questionnaire (SDM-Q-9) University Medical Center Hamburg-Eppendorf, Germany. Available from: http://www.patient-als-partner.de/index.php?article_id=20&clang=2/. Creative Commons Attribution-NonCommercial-No Derivatives 4.0 International License (http://creativecommons.org/licenses/by-nc-nd/4.0/legalcode).

STUDY TITLE:

**Patients’ involvement in decision-making in a developing country.**

**Participant’s Code:**

|  | P | D |  |  |  |
| --- | --- | --- | --- | --- | --- |

The questionnaire has 15 questions and will take about 15 to 20 minutes to answer.

**Demographics**

1) Age ……………………. (in completed years)

2) Sex

a) Male

b) Female

3) Highest level of education

a) Primary

b) Secondary

c) Tertiary

d) University

e) None

4) Religion

a) Roman Catholic

b) Anglican

c) Muslim

d) Others, specify; .............................

5) Marital status

a) Single

b) Married

c) Divorced

d) Widow/Widower

e) Relationship

***Patient involvement in decision making***

1. Do you know the names of the following people who are taking care of you? (circle what applies).

Your Doctor (a) Yes (b) No

Your Nurse (a) Yes (b) No

*This section has nine questions, please circle or tick the statement that applies to you.*

1. My doctor gave me enough time to tell him all my symptoms and signs.

a) Strongly agree

b) Agree

c) Neutral

d) Disagree

e) Strongly disagree

1. My doctor asked me what I thought was the cause of my illness

a) Strongly agree

b) Agree

c) Neutral

d) Disagree

e) Strongly disagree

1. My doctor explained to me the cause of my illness

a) Strongly agree

b) Agree

c) Neutral

d) Disagree

e) Strongly disagree

1. My doctor explained to me the required tests (investigations) and possible treatment options.

a) Strongly agree

b) Agree

c) Neutral

d) Disagree

e) Strongly disagree

1. My doctor explained to me the importance of treatment and its side effects.

a) Strongly agree

b) Agree

c) Neutral

d) Disagree

e) Strongly disagree

1. My doctor inquired if I had understood all the information and asked me for any questions that I had for him/her.

a) Strongly agree

b) Agree

c) Neutral

d) Disagree

e) Strongly disagree

1. My doctor and I thoroughly weighed the investigations and treatment options together.

a) Strongly agree

b) Agree

c) Neutral

d) Disagree

e) Strongly disagree

1. My doctor and I made a decision together about my treatment.

a) Strongly agree

b) Agree

c) Neutral

d) Disagree

e) Strongly disagree

1. My doctor and I reached an agreement on how to proceed.

a) Strongly agree

b) Agree

c) Neutral

d) Disagree

e) Strongly disagree
